# Supplementary material
Source: PubMed Central journal article supplement (PMC6698940)

### SAG2c

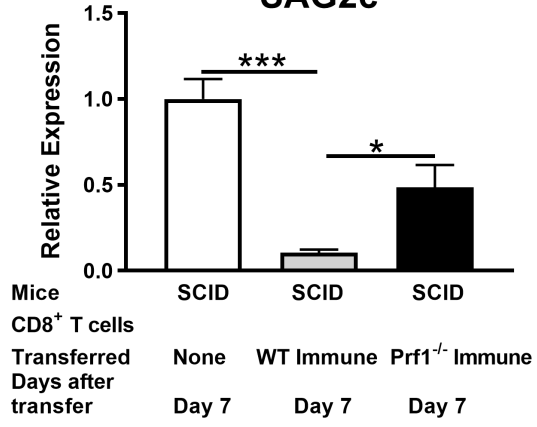

Supplement: mmc1.pdf [file mmc1.pdf]

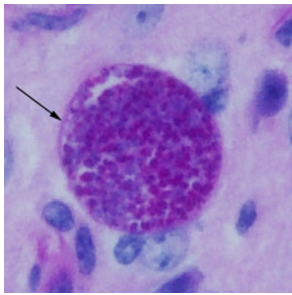

Supplement: mmc2.pdf [file mmc2.pdf]

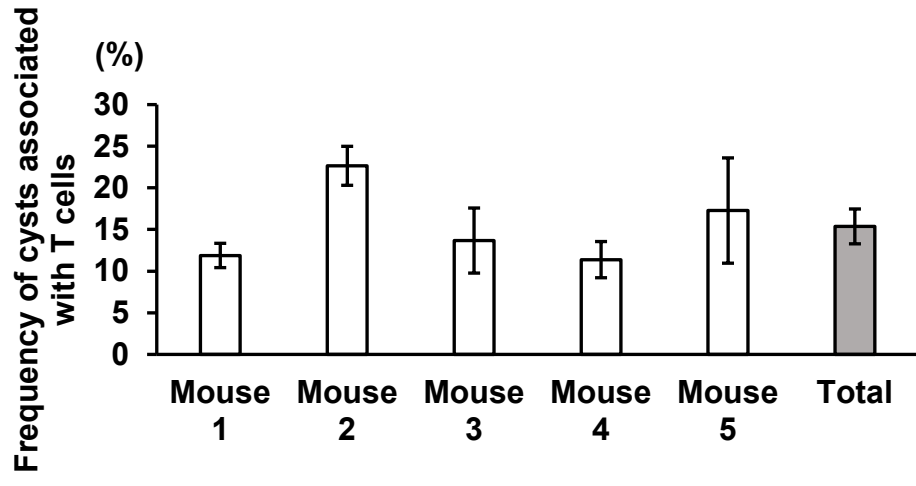

Supplement: mmc3.pdf [file mmc3.pdf]

Top

Bottom

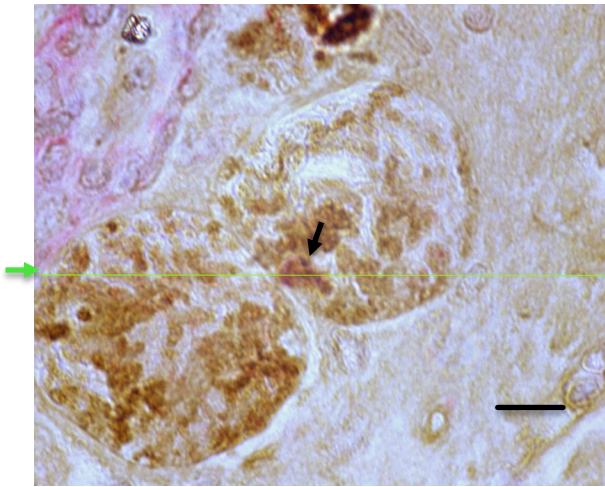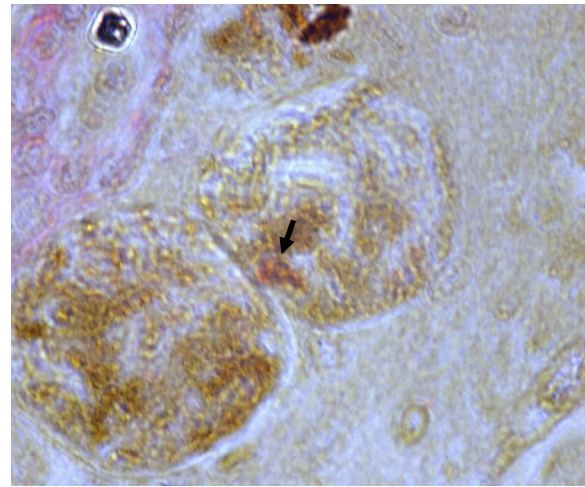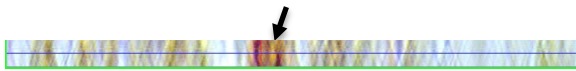

Z-stack image

Supplement: mmc4.pdf [file mmc4.pdf]
